# Supplementary figures and images for: Porphyromonas, a potential predictive biomarker of Pseudomonas aeruginosa pulmonary infection in cystic fibrosis
Source: PubMed Central journal article supplement — BMJ Open Respir Res. 2019 Mar 12;6(1):e000374. doi: 10.1136/bmjresp-2018-000374 (PMC6424284; doi:10.1136/bmjresp-2018-000374), 2019-03-12

**a)****Pulmotype A**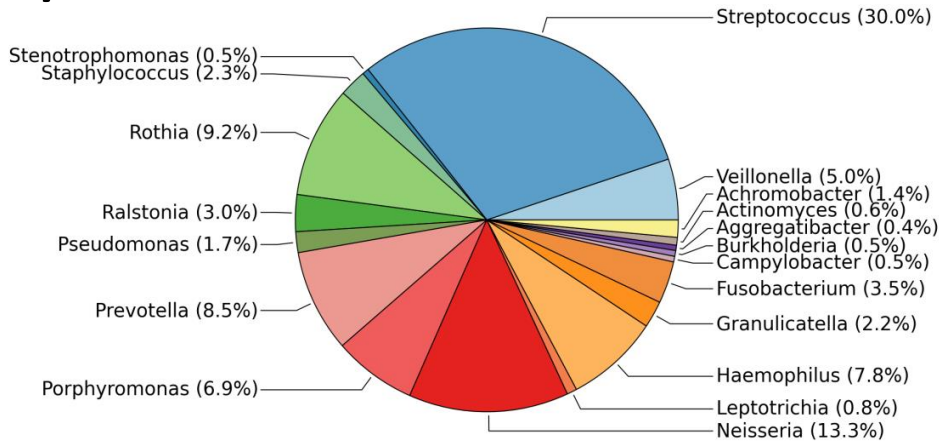**b)**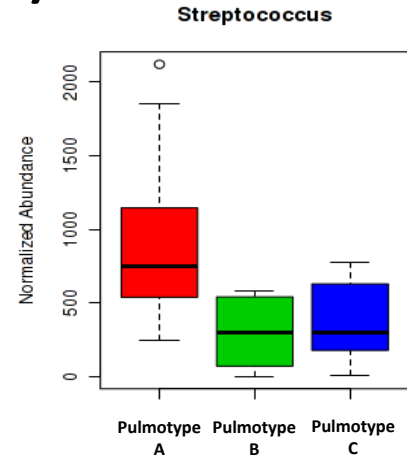**Pulmotype B**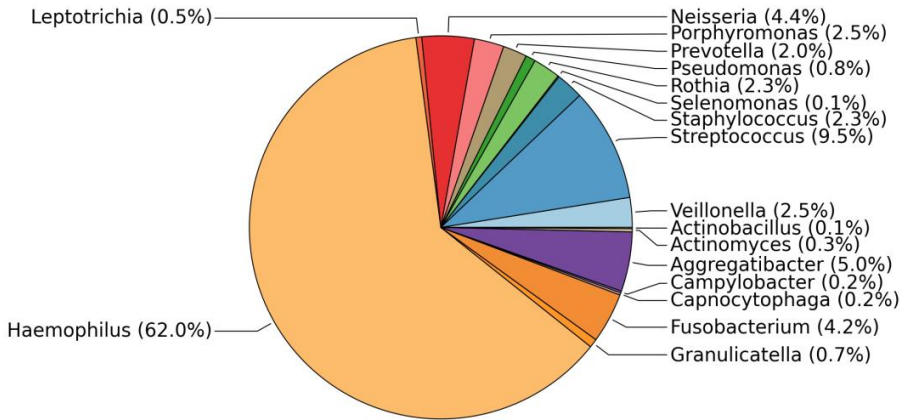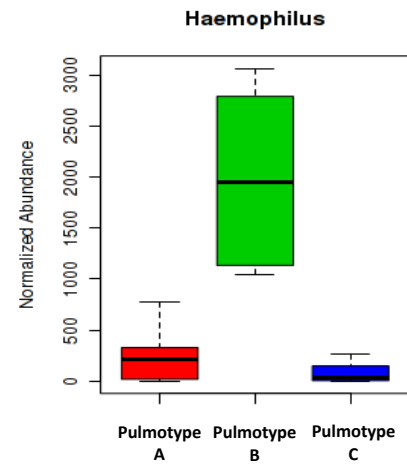**Pulmotype C**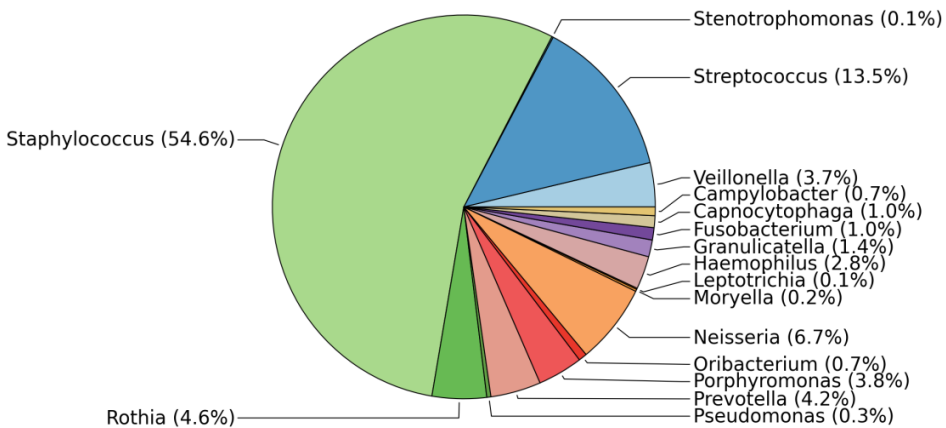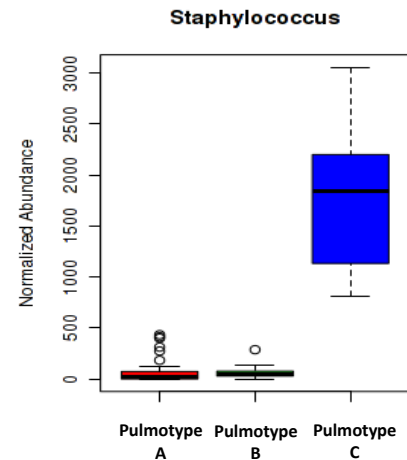

Supplement: bmjresp-2018-000374supp002.pdf [file bmjresp-2018-000374supp002.pdf]
